# Supplementary material for: Autosomal dominant Alport syndrome: molecular analysis of the COL4A4 gene and clinical outcome
Source: Oxford University Press journal article supplement (doi:10.1093/ndt/gfn681), 2009-01-07
Supplement: gfn681_Supplementary_Data.zip [file gfn681_Supplementary_Data.zip]

Archive with 1 entries (1 files):
- Suppl_gfn681.pdf
