# Supplementary material for: Autosomal dominant Alport syndrome: molecular analysis of the COL4A4 gene and clinical outcome
Source: Oxford University Press journal article supplement (doi:10.1093/ndt/gfn681), 2009-01-07
Supplement: gfn681_Supplementary_Data.zip [file gfn681_Supplementary_Data.zip › Suppl_gfn681.pdf]

**Supplementary Figure 1.** DHPLC pattern and sequence of identified mutations. The left side of each panel represents the DHPLC pattern of key individuals in families 1 (a), 2 (b), 3 (c), 4 (d), 5 (e), 6 (f), 7 (g), 8 (h). On the right side of each panel the mutated sequence is reported with the mutation written above. Note that the control (C) shows always a unique peak (homoduplex peak) while patients (P) show additional peaks.
